# Supplementary figures and images for: Microglia Play a Major Role in Direct Viral-Induced Demyelination
Source: Hindawi journal article supplement (doi:10.1155/2013/510396), 2013-01-01

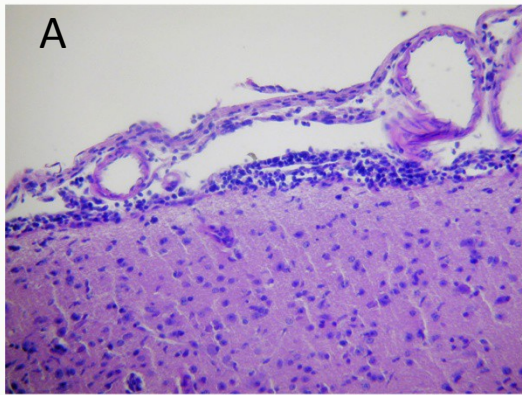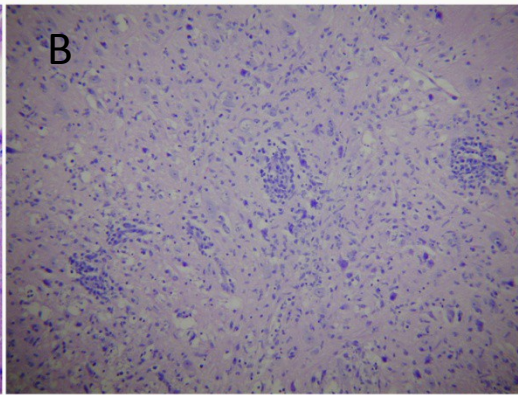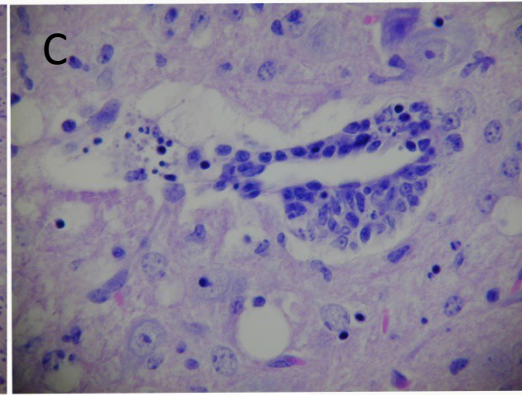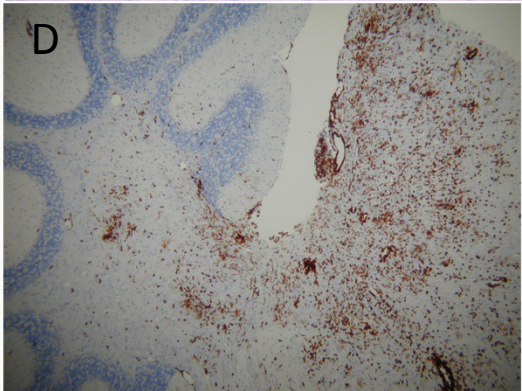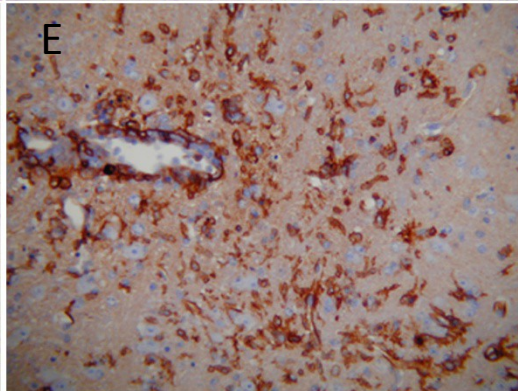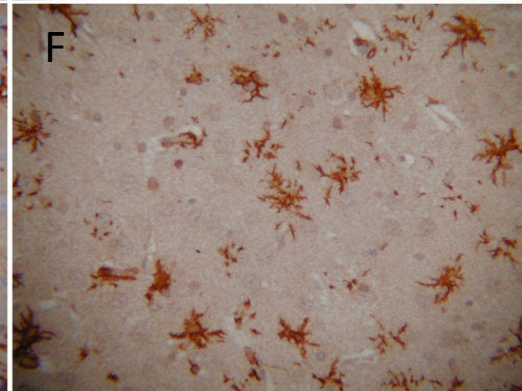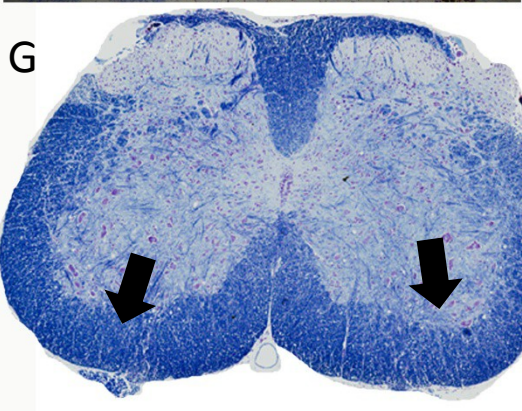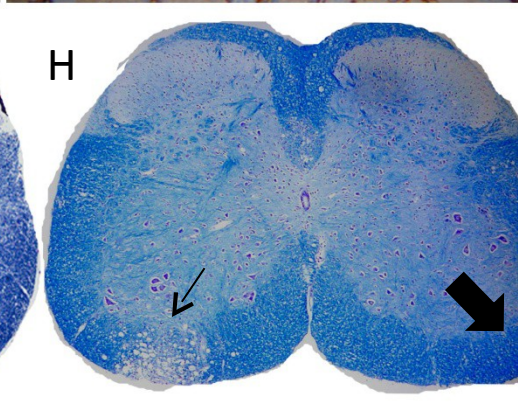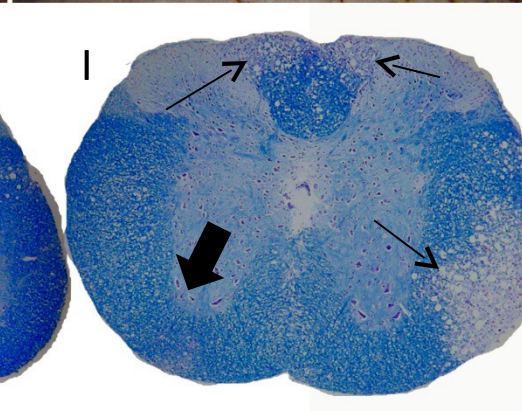

Supplement: f1 [file 510396.f1.pdf]

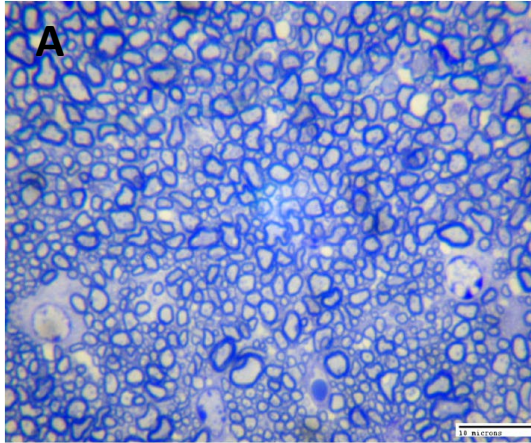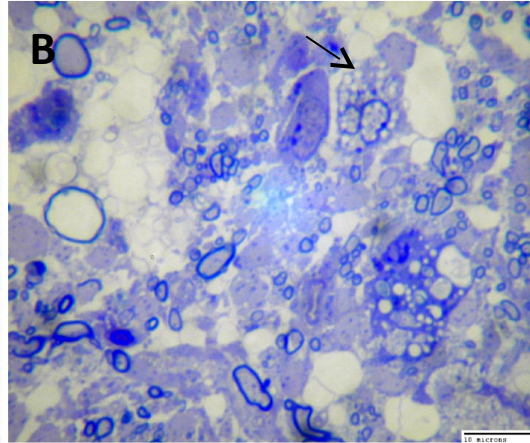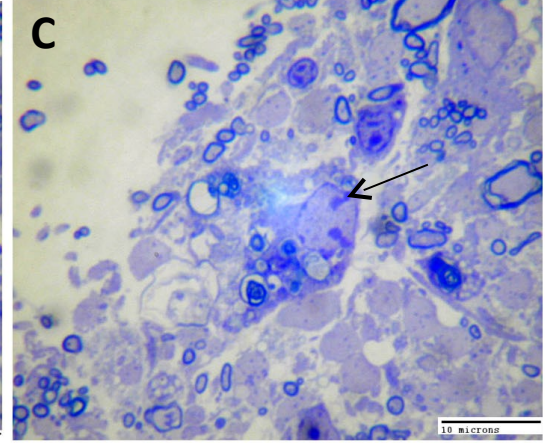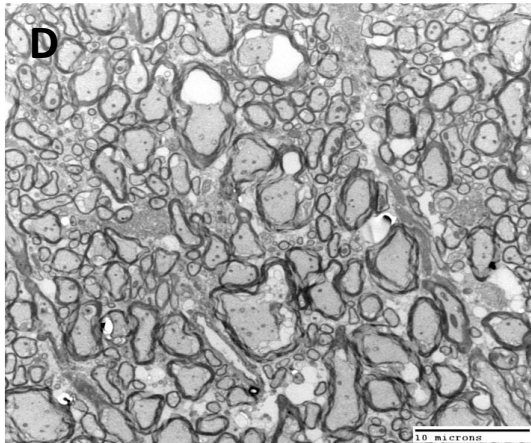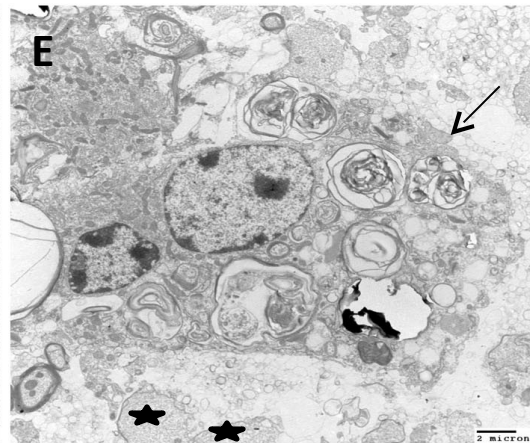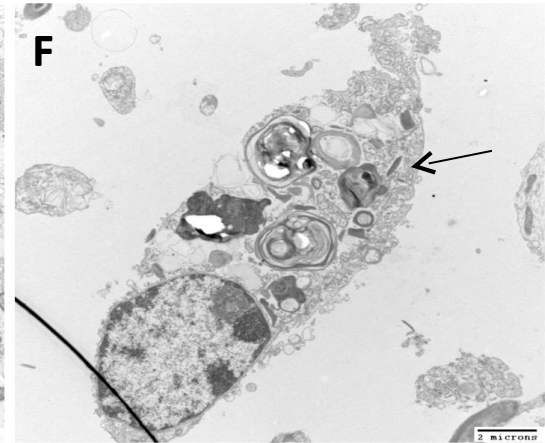

Supplement: f2 [file 510396.f2.pdf]
